# Supplementary material
Source: publisher site journal article supplement (https://www.dovepress.com/article/447921)
Supplement: Supplementary file 1 [file get_supplementary_file.php]

**Supplementary figure 1: Participant Recruitment Flow Diagram for the Study.**

This figure outlines the recruitment process, starting with 486 approached participants, of which 408 provided complete data, resulting in an 83.95% response rate. Participants with incomplete data were excluded to ensure data quality. This concise depiction highlights the effective selection methodology and data integrity.

Informed consent was obtained and subjects were included (n=408)

Subjects were included according to inclusion and exclusion criteria (n=486)

Excluded (n=78)

a: Refused (n=67)

b: Withdrawn (n=11)

**Supplementary table 1: The sociodemographic data comparison between the Joined Group and the Not Joined Group.**

This table presents a comprehensive comparison of sociodemographic data between participants who joined the study (Joined Group) and those who did not participate (Not Joined Group). The variables compared include Age, Sex, Marital Status, Educational Level, Ethnic Background, Employment Status, and Healthcare Payment Mode. Statistical analysis revealed no significant differences between the two groups across these sociodemographic variables, indicating homogeneity in the baseline characteristics of both cohorts.

|  |  | Jointed Group | Not Joined Group | t/X2 | p |
| --- | --- | --- | --- | --- | --- |
|  |  | (n=408)  n, % | (n=78)  n, % |  |  |
| Age (mean±SD) |  | 51.56±12.87 | 53.64±12.79 | -1.17 | 0.240a |
| Sex | Male | 252(61.76%) | 45(57.69%) | 0.483 | 0.487b |
|  | Female | 156(38.24%) | 23(29.49%) |  |  |
| Marital status | Unmarried or single | 77(18.87%) | 17(21.79%) | 0.009 | 0.923b |
|  | Married | 331(81.13%) | 61(78.21%) |  |  |
| Educational level | Elementary school or below | 71(17.40%) | 13(16.67%) | 1.576 | 0.665b |
|  | Secondary school | 129(31.62%) | 27(34.62%) |  |  |
|  | High school | 151(37.01%) | 31(39.74%) |  |  |
|  | Batchelor degree or above | 57(13.97%) | 7(8.97%) |  |  |
| Ethnic | Han | 382(93.63%) | 74(94.87%) |  | 0.802c |
|  | Minority | 26(6.37%) | 4(5.13%) |  |  |
| Employment status | Employed | 112(27.45%) | 24(30.77%) | 0.358 | 0.550b |
|  | Unemployed | 296(72.55%) | 54(69.23%) |  |  |
| Healthcare payment mode | No | 10(2.45%) | 2(2.56%) |  | 1.000c |
|  | Yes | 398(97.55%) | 76(97.44%) |  |  |

Note: a= t test; b=Chi-square test; c= Fisher’s test; SD=Standard error

**Supplementary table 2. Weight of each connection in the network**

This table details the weights of each connection within the network of 22 DKD symptoms analyzed in this study. The weights represent the strength of the associations between symptoms, as determined through network analysis techniques. Each entry delineates the pairwise connection strength, offering insights into the interconnectedness and potential symptom clusters within DKD.

|  | A1 | A2 | A3 | A4 | A5 | A6 | B1 | B2 | B3 | B4 | B5 | B6 | Others_1 | Others_2 | C1 | C2 | D1 | D2 | D3 | D4 | E1 | E2 |
| --- | --- | --- | --- | --- | --- | --- | --- | --- | --- | --- | --- | --- | --- | --- | --- | --- | --- | --- | --- | --- | --- | --- |
| A1 | 0 | 0.30 | 0.15 | 0.22 | 0.11 | 0.14 | -0.06 | 0.13 | -0.07 | -0.16 | 0.03 | 0.15 | 0.00 | 0.00 | 0.03 | 0.05 | -0.02 | 0.00 | 0.08 | -0.06 | 0.01 | -0.03 |
| A2 | 0.30 | 0.00 | 0.26 | 0.06 | 0.02 | -0.02 | 0.00 | -0.06 | 0.03 | 0.01 | -0.01 | 0.09 | 0.01 | 0.09 | 0.09 | -0.09 | 0.01 | -0.03 | 0.01 | 0.09 | -0.08 | 0.01 |
| A3 | 0.15 | 0.26 | 0.00 | -0.01 | 0.01 | 0.01 | -0.10 | 0.10 | -0.06 | -0.01 | 0.16 | -0.09 | 0.00 | 0.03 | -0.13 | 0.15 | 0.03 | 0.06 | 0.02 | 0.16 | -0.03 | 0.10 |
| A4 | 0.22 | 0.06 | -0.01 | 0.00 | 0.12 | 0.09 | 0.01 | 0.09 | 0.06 | 0.07 | 0.08 | -0.09 | 0.11 | 0.09 | -0.01 | -0.05 | 0.12 | -0.16 | 0.05 | 0.08 | -0.10 | 0.12 |
| A5 | 0.11 | 0.02 | 0.01 | 0.12 | 0.00 | 0.29 | -0.01 | 0.23 | 0.07 | -0.05 | 0.04 | 0.07 | -0.02 | -0.10 | 0.11 | -0.13 | 0.02 | 0.06 | 0.11 | 0.11 | 0.02 | 0.06 |
| A6 | 0.14 | -0.02 | 0.01 | 0.09 | 0.29 | 0.00 | 0.06 | -0.06 | 0.06 | 0.04 | -0.02 | -0.15 | 0.11 | 0.00 | 0.06 | -0.08 | 0.02 | 0.07 | -0.04 | -0.03 | 0.02 | 0.02 |
| B1 | -0.06 | 0.00 | -0.10 | 0.01 | -0.01 | 0.06 | 0.00 | 0.27 | 0.09 | 0.08 | 0.09 | -0.02 | 0.05 | 0.09 | -0.07 | 0.12 | -0.05 | 0.02 | 0.12 | -0.04 | 0.11 | -0.08 |
| B2 | 0.13 | -0.06 | 0.10 | 0.09 | 0.23 | -0.06 | 0.27 | 0.00 | 0.20 | 0.33 | 0.09 | 0.12 | 0.05 | 0.04 | 0.11 | -0.17 | -0.16 | -0.04 | -0.13 | 0.04 | -0.04 | -0.11 |
| B3 | -0.07 | 0.03 | -0.06 | 0.06 | 0.07 | 0.06 | 0.09 | 0.20 | 0.00 | -0.15 | 0.19 | 0.14 | -0.07 | 0.10 | -0.14 | 0.11 | 0.08 | 0.16 | 0.00 | 0.03 | 0.05 | -0.11 |
| B4 | -0.16 | 0.01 | -0.01 | 0.07 | -0.05 | 0.04 | 0.08 | 0.33 | -0.15 | 0.00 | -0.04 | 0.07 | 0.03 | 0.04 | -0.16 | 0.26 | 0.10 | 0.08 | 0.11 | 0.06 | 0.17 | -0.02 |
| B5 | 0.03 | -0.01 | 0.16 | 0.08 | 0.04 | -0.02 | 0.09 | 0.09 | 0.19 | -0.04 | 0.00 | 0.22 | 0.12 | 0.08 | -0.08 | 0.08 | 0.00 | 0.02 | 0.07 | -0.02 | 0.01 | 0.03 |
| B6 | 0.15 | 0.09 | -0.09 | -0.09 | 0.07 | -0.15 | -0.02 | 0.12 | 0.14 | 0.07 | 0.22 | 0.00 | 0.35 | -0.03 | -0.05 | 0.00 | 0.15 | 0.08 | 0.03 | -0.02 | -0.02 | -0.03 |
| Others_1 | 0.00 | 0.01 | 0.00 | 0.11 | -0.02 | 0.11 | 0.05 | 0.05 | -0.07 | 0.03 | 0.12 | 0.35 | 0.00 | 0.04 | 0.13 | -0.10 | 0.00 | 0.06 | -0.03 | 0.06 | -0.04 | 0.00 |
| Others_2 | 0.00 | 0.09 | 0.03 | 0.09 | -0.10 | 0.00 | 0.09 | 0.04 | 0.10 | 0.04 | 0.08 | -0.03 | 0.04 | 0.00 | 0.14 | -0.14 | -0.07 | -0.01 | 0.19 | 0.07 | 0.00 | -0.03 |
| C1 | 0.03 | 0.09 | -0.13 | -0.01 | 0.11 | 0.06 | -0.07 | 0.11 | -0.14 | -0.16 | -0.08 | -0.05 | 0.13 | 0.14 | 0.00 | 0.87 | 0.13 | 0.16 | 0.14 | 0.05 | -0.07 | 0.12 |
| C2 | 0.05 | -0.09 | 0.15 | -0.05 | -0.13 | -0.08 | 0.12 | -0.17 | 0.11 | 0.26 | 0.08 | 0.00 | -0.10 | -0.14 | 0.87 | 0.00 | -0.13 | -0.11 | -0.12 | 0.02 | 0.07 | -0.06 |
| D1 | -0.02 | 0.01 | 0.03 | 0.12 | 0.02 | 0.02 | -0.05 | -0.16 | 0.08 | 0.10 | 0.00 | 0.15 | 0.00 | -0.07 | 0.13 | -0.13 | 0.00 | 0.00 | 0.13 | 0.08 | 0.03 | -0.10 |
| D2 | 0.00 | -0.03 | 0.06 | -0.16 | 0.06 | 0.07 | 0.02 | -0.04 | 0.16 | 0.08 | 0.02 | 0.08 | 0.06 | -0.01 | 0.16 | -0.11 | 0.00 | 0.00 | 0.13 | 0.17 | 0.00 | 0.11 |
| D3 | 0.08 | 0.01 | 0.02 | 0.05 | 0.11 | -0.04 | 0.12 | -0.13 | 0.00 | 0.11 | 0.07 | 0.03 | -0.03 | 0.19 | 0.14 | -0.12 | 0.13 | 0.13 | 0.00 | 0.03 | -0.01 | -0.02 |
| D4 | -0.06 | 0.09 | 0.16 | 0.08 | 0.11 | -0.03 | -0.04 | 0.04 | 0.03 | 0.06 | -0.02 | -0.02 | 0.06 | 0.07 | 0.05 | 0.02 | 0.08 | 0.17 | 0.03 | 0.00 | 0.07 | -0.10 |
| E1 | 0.01 | -0.08 | -0.03 | -0.10 | 0.02 | 0.02 | 0.11 | -0.04 | 0.05 | 0.17 | 0.01 | -0.02 | -0.04 | 0.00 | -0.07 | 0.07 | 0.03 | 0.00 | -0.01 | 0.07 | 0.00 | 0.50 |
| E2 | -0.03 | 0.01 | 0.10 | 0.12 | 0.06 | 0.02 | -0.08 | -0.11 | -0.11 | -0.02 | 0.03 | -0.03 | 0.00 | -0.03 | 0.12 | -0.06 | -0.10 | 0.11 | -0.02 | -0.10 | 0.50 | 0.00 |

Note: Frequent waking=Frequent waking; Trouble falling asleep=A2; Feeling anxious=A3; Palpitation=A4; Bone or joint pain=A5; Numbness or tingling in feet=A6; Diarrhea=B1; Facial oedema=B2; Constipation= B3; Swelling in legs=B4; Dry mouth =B5; Dry skin=B6; Difficulty becoming sexually aroused=C1; Decreased interest in sex=C2; Muscle cramps=D1; Blurred vision=D2; Nausea=D3; Feeling tired or lack of energy= D4; Foam urine = E1; Nocturia=E2; Itching = Others_1; Decreased appetite=Others_2

**Supplementary table 3. The centrality indices of symptom nodes.**

This table presents centrality measures (strength, betweenness, and closeness) for 22 symptoms in the DKD symptom network. These indices quantify the role and influence of each symptom within the network, illustrating their connectivity, bridging capacity, and proximity to other symptoms, respectively.

| Node | Measure | Value |
| --- | --- | --- |
| Frequent waking | Betweenness | 0.84 |
| Trouble falling asleep | Betweenness | -0.99 |
| Feeling anxious | Betweenness | 0.53 |
| Palpitation | Betweenness | -0.23 |
| Bone or joint pain | Betweenness | 0.84 |
| Numbness or tingling in feet | Betweenness | -0.68 |
| Diarrhea | Betweenness | -1.14 |
| Facial oedema | Betweenness | 2.81 |
| Constipation | Betweenness | 0.23 |
| Swelling in legs | Betweenness | 0.38 |
| Dry mouth | Betweenness | -0.23 |
| Dry skin | Betweenness | 0.84 |
| Itching | Betweenness | -0.84 |
| Decreased appetite | Betweenness | -1.14 |
| Difficulty becoming sexually aroused | Betweenness | 1.44 |
| Decreased interest in sex | Betweenness | 0.68 |
| Muscle cramps | Betweenness | -0.99 |
| Blurred vision | Betweenness | 0.08 |
| Nausea | Betweenness | -0.68 |
| Feeling tired or lack of energy | Betweenness | -0.99 |
| Foam urine | Betweenness | -0.84 |
| Nocturia | Betweenness | 0.08 |
| Frequent waking | Closeness | 0.58 |
| Trouble falling asleep | Closeness | -0.54 |
| Feeling anxious | Closeness | -0.04 |
| Palpitation | Closeness | -0.01 |
| Bone or joint pain | Closeness | 0.33 |
| Numbness or tingling in feet | Closeness | -0.71 |
| Diarrhea | Closeness | -0.20 |
| Facial oedema | Closeness | 2.10 |
| Constipation | Closeness | 0.58 |
| Swelling in legs | Closeness | 1.50 |
| Dry mouth | Closeness | -0.56 |
| Dry skin | Closeness | -0.15 |
| Itching | Closeness | -0.86 |
| Decreased appetite | Closeness | -1.16 |
| Difficulty becoming sexually aroused | Closeness | 1.77 |
| Decreased interest in sex | Closeness | 1.77 |
| Muscle cramps | Closeness | -0.21 |
| Blurred vision | Closeness | -0.41 |
| Nausea | Closeness | -0.72 |
| Feeling tired or lack of energy | Closeness | -1.35 |
| Foam urine | Closeness | -1.02 |
| Nocturia | Closeness | -0.69 |
| Frequent waking | Strength | 0.06 |
| Trouble falling asleep | Strength | -0.88 |
| Feeling anxious | Strength | -0.24 |
| Palpitation | Strength | 0.02 |
| Bone or joint pain | Strength | -0.02 |
| Numbness or tingling in feet | Strength | -0.78 |
| Diarrhea | Strength | -0.49 |
| Facial oedema | Strength | 1.71 |
| Constipation | Strength | 0.41 |
| Swelling in legs | Strength | 0.58 |
| Dry mouth | Strength | -0.66 |
| Dry skin | Strength | 0.42 |
| Itching | Strength | -0.84 |
| Decreased appetite | Strength | -0.87 |
| Difficulty becoming sexually aroused | Strength | 2.33 |
| Decreased interest in sex | Strength | 2.49 |
| Muscle cramps | Strength | -0.74 |
| Blurred vision | Strength | -0.56 |
| Nausea | Strength | -0.46 |
| Feeling tired or lack of energy | Strength | -0.82 |
| Foam urine | Strength | -0.65 |
| Nocturia | Strength | -0.04 |
